# Supplementary material for: Development of the Pulmonary Arterial Hypertension-Symptoms and Impact (PAH-SYMPACT®) questionnaire: a new patient-reported outcome instrument for PAH
Source: PubMed Central journal article supplement (PMC4908719; doi:10.1186/s12931-016-0388-6), 2016-06-14
Supplement: 12931_2016_388_MOESM1_ESM.pdf [file 12931_2016_388_MOESM1_ESM.pdf]

## Additional file

Supplementary Table. Additional patient demographic and clinical characteristics for targeted recruitment and enrolled cohort

|                                                 | Target | Phase 1: Focus Groups (n=25) | Phase 2: Cognitive Interviews (n=20) | Phase 3: Cognitive/Usability Interviews (n=10) | Total Sample (n=55) |
|-------------------------------------------------|--------|------------------------------|--------------------------------------|------------------------------------------------|---------------------|
| Current living/domestic situation (n, %)        | N/A    |                              |                                      |                                                |                     |
| Living with a spouse, partner, or family member |        | 20 (80%)                     | 12 (60%)                             | 9 (90%)                                        | 41 (75%)            |
| Living alone                                    |        | 4 (16%)                      | 7 (35%)                              | 1 (10%)                                        | 12 (22%)            |
| Living with friends                             |        | 0 (0%)                       | 1 (5%)                               | 0 (0%)                                         | 1 (2%)              |
| Other*                                          |        | 1 (4%)                       | 0 (0%)                               | 0 (0%)                                         | 1 (2%)              |
| Employment status (n, %)                        | N/A    |                              |                                      |                                                |                     |
| Not working due to disability                   |        | 10 (40%)                     | 8 (40%)                              | 4 (40%)                                        | 22 (40%)            |
| Full-time paid work                             |        | 1 (4%)                       | 3 (15%)                              | 2 (20%)                                        | 6 (11%)             |
| Retired                                         |        | 6 (24%)                      | 6 (30%)                              | 2 (20%)                                        | 14 (25%)            |
| Homemaker                                       |        | 2 (8%)                       | 3 (15%)                              | 1 (10%)                                        | 6 (11%)             |
| Part-time paid work                             |        | 3 (12%)                      | 1 (5%)                               | 1 (10%)                                        | 5 (9%)              |
| Student                                         |        | 1 (4%)                       | 0 (0%)                               | 0 (0%)                                         | 1 (2%)              |
| Unemployed                                      |        | 2 (8%)                       | 2 (10%)                              | 0 (0%)                                         | 4 (7%)              |
| Other <sup>†</sup>                              |        | 1 (4%)                       | 0 (0%)                               | 0 (0%)                                         | 1 (2%)              |
| Smoking status                                  | N/A    |                              |                                      |                                                |                     |
| Not a current smoker                            |        | 23 (92%)                     | 20 (100%)                            | 9 (90%)                                        | 52 (95%)            |
| Current smoker                                  |        | 2 (8%)                       | 0 (0%)                               | 1 (10%)                                        | 3 (5%)              |
| Comorbidities (n, %) <sup>†</sup>               | N/A    |                              |                                      |                                                |                     |
| Hypertension (other than PAH) <sup>‡</sup>      |        | 9 (36%)                      | 8 (40%)                              | 2 (20%)                                        | 19 (35%)            |
| Obesity (defined as BMI >30)                    |        | 9 (36%)                      | 5 (25%)                              | 3 (30%)                                        | 17 (31%)            |
| Depression <sup>§</sup>                         |        | 4 (16%)                      | 8 (40%)                              | 1 (10%)                                        | 13 (24%)            |
| Congestive heart failure <sup>¶</sup>           |        | 9 (36%)                      | 0 (0%)                               | 1 (10%)                                        | 10 (18%)            |
| Diabetes <sup>  </sup>                          |        | 4 (16%)                      | 2 (10%)                              | 2 (20%)                                        | 8 (15%)             |

|                                                           | Target                                                        | Phase 1: Focus Groups (n=25) | Phase 2: Cognitive Interviews (n=20) | Phase 3: Cognitive/Usability Interviews (n=10) | Total Sample (n=55) |
|-----------------------------------------------------------|---------------------------------------------------------------|------------------------------|--------------------------------------|------------------------------------------------|---------------------|
| Chronic obstructive pulmonary disease**                   |                                                               | 1 (4%)                       | 1 (5%)                               | 1 (10%)                                        | 3 (5%)              |
| Obstructive sleep apnea                                   |                                                               | N/A                          | 0 (0%)                               | 3 (30%)                                        | 3 (5%)              |
| Kidney disease                                            |                                                               | 1 (4%)                       | 1 (5%)                               | 0 (0%)                                         | 2 (4%)              |
| Other††                                                   |                                                               | 10 (40%)                     | 7 (35%)                              | 3 (30%)                                        | 20 (36%)            |
| None of the above                                         |                                                               | 1 (4%)                       | 4 (20%)                              | 3 (30%)                                        | 8 (15%)             |
| Current therapy route of administration                   |                                                               |                              |                                      |                                                |                     |
| Parenteral (IV/subcutaneous)                              | No exact target to meet aside from diversity of therapy route | 10 (40%)                     | 8 (40%)                              | 3 (30%)                                        | 21 (38%)            |
| Other (oral/inhaled)                                      | No exact target to meet aside from diversity of therapy route | 22 (88%)                     | 15 (75%)                             | 10 (100%)                                      | 47 (85%)            |
| Current prescribed PAH medication†                        |                                                               |                              |                                      |                                                |                     |
| PAH-specific medications                                  |                                                               |                              |                                      |                                                |                     |
| Endothelin receptor antagonist                            |                                                               | 14 (56%)                     | 10 (50%)                             | 8 (80%)                                        | 32 (58%)            |
| Phosphodiesterase type 5 inhibitor                        |                                                               | 9 (36%)                      | 13 (65%)                             | 3 (30%)                                        | 24 (44%)            |
| Prostacyclin/prostaglandin – parenteral (IV/subcutaneous) |                                                               | 10 (40%)                     | 8 (40%)                              | 3 (30%)                                        | 21 (38%)            |
| Prostacyclin/prostaglandin – oral/inhaled                 |                                                               | 3 (12%)                      | 3 (15%)                              | 0 (0%)                                         | 6 (11%)             |

|                                                       | Target                  | Phase 1: Focus Groups (n=25) | Phase 2: Cognitive Interviews (n=20) | Phase 3: Cognitive/Usability Interviews (n=10) | Total Sample (n=55) |
|-------------------------------------------------------|-------------------------|------------------------------|--------------------------------------|------------------------------------------------|---------------------|
| Number                                                |                         |                              |                                      |                                                |                     |
| 0                                                     |                         | 2 (3.6%)                     | 0 (0.0%)                             | 0 (0.0%)                                       | 2 (3.6%)            |
| 1                                                     |                         | 12 (21.8%)                   | 9 (16.4%)                            | 6 (10.9%)                                      | 27 (49.1%)          |
| 2                                                     |                         | 9 (16.4%)                    | 9 (16.4%)                            | 4 (7.3%)                                       | 22 (40.0%)          |
| 3                                                     |                         | 2 (3.6%)                     | 2 (3.6%)                             | 0 (0.0%)                                       | 4 (7.3%)            |
| Mean ± SD (range)                                     |                         | 1.44 ± 0.77 (0–3)            | 1.65 ± 0.67 (1–3)                    | 1.40 ± 0.51 (1–2)                              | 1.51 ± 0.69 (0–3)   |
| Medications not specific to PAH                       |                         |                              |                                      |                                                |                     |
| Anticoagulant                                         |                         | 9 (36%)                      | 7 (35%)                              | 6 (60%)                                        | 22 (40%)            |
| Oxygen therapy <sup>††</sup>                          |                         | 11 (44%)                     | 9 (45%)                              | 5 (50%)                                        | 25 (45%)            |
| Using oxygen at least once a day                      | 10%–15%                 | 11 (44%)                     | 9 (45%)                              | 5 (50%)                                        | 25 (45%)            |
| Not using oxygen or using oxygen less than once a day | No exact target to meet | 14 (56%)                     | 11 (55%)                             | 5 (50%)                                        | 30 (55%)            |
| Diuretic                                              |                         | 16 (64%)                     | 9 (45%)                              | 4 (40%)                                        | 29 (53%)            |
| Calcium channel blocker                               |                         | 11 (44%)                     | 4 (20%)                              | 3 (30%)                                        | 18 (33%)            |
| Digoxin/digitalis                                     |                         | 1 (4%)                       | 1 (5%)                               | 1 (10%)                                        | 3 (5%)              |
| Other <sup>§§</sup>                                   |                         | 1 (4%)                       | 1 (5%)                               | 0 (0%)                                         | 2 (4%)              |
| Number                                                |                         |                              |                                      |                                                |                     |
| 0                                                     |                         | 2 (3.6%)                     | 2 (3.6%)                             | 3 (5.5%)                                       | 7 (12.7%)           |
| 1                                                     |                         | 8 (14.6%)                    | 9 (16.4%)                            | 1 (1.8%)                                       | 18 (32.7%)          |
| 2                                                     |                         | 5 (9.1%)                     | 6 (10.9%)                            | 1 (1.8%)                                       | 12 (21.8%)          |
| 3                                                     |                         | 9 (16.4%)                    | 2 (3.6%)                             | 4 (7.3%)                                       | 15 (27.3%)          |
| 4                                                     |                         | 1 (1.8%)                     | 1 (1.8%)                             | 1 (1.8%)                                       | 3 (5.5%)            |
| Mean ± SD (range)                                     |                         | 1.96 ± 1.10 (0–4)            | 1.55 ± 0.10 (0–4)                    | 1.90 ± 1.52 (0–4)                              | 1.80 ± 1.15 (0–4)   |

\*Other “No” (n=1); <sup>‡</sup>Other: “Artist” (n=1); “Diploma RN (3 yrs)” (n=1); <sup>†</sup>Not mutually exclusive; <sup>‡</sup>Hypertension other than PAH: treated (n=2);

<sup>§</sup>Depression: treated (n=11), untreated (n=2); <sup>¶</sup>Congestive heart failure: NYHA I (n=1), NYHA II (n=4), NYHA III (n=3), did not specify (n=1);

<sup>||</sup>Diabetes: treated (n=7), untreated (n=1); <sup>\*\*</sup>Chronic obstructive pulmonary disease: Gold Stage I (n=2), Gold Stage II (n=1); <sup>††</sup>Other condition:

bipolar affective disorder (n=1), collagen vascular disease-CREST (n=1), idiopathic cardiomyopathy (n=1), atrial septal defect repaired with Amplatzer septal occlude (n=1), asthma (n=1), CREST syndrome (n=2), hypothyroidism (n=4), medical history of transient ischemic attack (n=1), incontinentia pigmenti (n=1), lupus (n=1), rheumatoid arthritis (n=1), monoclonal gammopathy of undetermined significance (n=1), chronic hepatitis (n=1), fatty liver disease (n=1), human immunodeficiency virus (n=1), hepatitis c (n=1), thyroid (n=1), scleroderma (n=1), neurofibrosis (n=1); <sup>††</sup>Oxygen was prescribed for PAH. Hours per day: 24 hours (n=4); 8 hours (n=1); <sup>§§</sup>Other medications: arginine (n=1); BMI: body mass index; CREST: calcinosis, Raynaud's syndrome, esophageal dysmotility, sclerodactyly, telangiectasia; IV: intravenous; N/A: not applicable; NYHA: New York Heart Association; PAH: pulmonary arterial hypertension; SD: standard deviation
